# Supplementary material for: Dose–response relationship between sports activity and musculoskeletal pain in adolescents
Source: PubMed Central journal article supplement — Pain. 2016 Feb 27;157(6):1339–45. doi: 10.1097/j.pain.0000000000000529 (PMC4866582; doi:10.1097/j.pain.0000000000000529), 2016-02-27
Supplement: jop-157-1339-s001.pdf [file jop-157-1339-s001.pdf]

| Birth Year of the Cohort<br>(academic year) | Grade at Survey 1<br>(2008) | Grade at Survey 2<br>(2009) |
|---------------------------------------------|-----------------------------|-----------------------------|
| 1990                                        | 12th grade (HS)             | -                           |
| 1991                                        | 11th grade (HS)             | 12th grade (HS)             |
| 1992                                        | 10th grade (HS)             | 11th grade (HS)             |
| 1993                                        | 9th grade (JHS)             | 10th grade (HS)             |
| 1994                                        | 8th grade (JHS)             | 9th grade (JHS)             |
| 1995                                        | 7th grade (JHS)             | 8th grade (JHS)             |
| 1996                                        | -                           | 7th grade (JHS)             |

  Serial cross-sectional analysis, n=2403  
 (single/repeated measurements)

  Cross-sectional analysis, n=1816  
 (single measurement, sensitivity analysis)

  Longitudinal analysis, n=374  
 (among students free of pain at survey 1)

**Figure S1.** Inclusion scheme for the data in the analyses.  
 JHS: junior high school; HS: high school.
