# Supplementary material for: Dose–response relationship between sports activity and musculoskeletal pain in adolescents
Source: PubMed Central journal article supplement — Pain. 2016 Feb 27;157(6):1339–45. doi: 10.1097/j.pain.0000000000000529 (PMC4866582; doi:10.1097/j.pain.0000000000000529), 2016-02-27
Supplement: jop-157-1339-s002.pdf [file jop-157-1339-s002.pdf]

# eQuestionnaire 1. Pain questionnaire for adolescents.

## Questions about pain

For each part of your body, please answer about “pain” that you have felt recently.  
If you do not have any pain, please circle “no pain”.

(Example) **0. (Location)** < have pain • no pain → Proceed to 2. Upper limb >

(1) Is it because you were injured (e.g., fell, hit a person or an object)?

< Yes • No >

(2) How long have you had the pain?

< 1 year or longer • 3 months or less • 1 month or less • 1 week or less >

(3) How often do you feel the pain?

< everyday • several times a week • several times a month • several times a year >

The anatomical locations  
are shown in black.

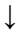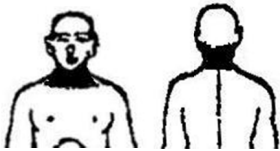

**1. Neck** < have pain • no pain → Proceed to 2. Upper limb >

(1) Is it because you were injured (e.g., fell, hit a person or an object)?

< Yes • No >

(2) How long have you had the pain?

< 1 year or longer • \_\_\_months or less • 1 month or less • 1 week or less >

(3) How often do you feel the pain?

< everyday • several times a week • several times a month • several times a year >

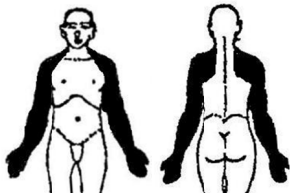

**2. Upper limbs (shoulder, arms, hands)** < have pain • no pain → Proceed to 3. Chest >

(1) Is it because you were injured (e.g. fell, hit a person or an object)?

< Yes • No >

(2) How long have you had the pain?

< 1 year or longer • \_\_\_months or less • 1 month or less • 1 week or less >

(3) How often do you feel the pain?

< everyday • several times a week • several times a month • several times a year >

(4) At which location do you have the pain?

< (e.g., shoulder, elbow, wrist, finger) \_\_\_\_\_ >

\*If you have pain at two or more locations in your upper limbs, please answer only about one with the most severe (strongest) pain.

**3. Chest** < have pain • no pain → Proceed to 4. Upper back >

(1) Is it because you were injured (e.g., fell, hit a person or an object)?

< Yes • No >

(2) How long have you had the pain?

< 1 year or longer • \_\_\_months or less • 1 month or less • 1 week or less >

(3) How often do you feel the pain?

< everyday • several times a week • several times a month • several times a year >

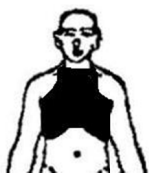

**4. Upper back** < have pain • no pain → Proceed to 5. Lower back >

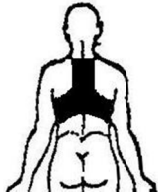

- (1) Is it because you were injured (e.g., fell, hit a person or an object)? < Yes • No >
- (2) How long have you had the pain? < 1 year or longer • \_\_\_months or less • 1 month or less • 1 week or less >
- (3) How often do you feel the pain? < everyday • several times a week • several times a month • several times a year >

**5. Lower back** < have pain • no pain → Proceed to 6. Buttock >

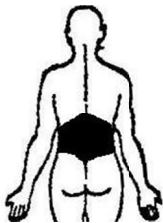

- (1) Is it because you were injured (e.g., fell, hit a person or an object)? < Yes • No >
- (2) How long have you had the pain? < 1 year or longer • \_\_\_months or less • 1 month or less • 1 week or less >
- (3) How often do you feel the pain? < everyday • several times a week • several times a month • several times a year >

**6. Buttocks** < have pain • no pain → Proceed to 7. Lower limb >

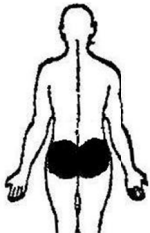

- (1) Is it because you were injured (e.g., fell, hit a person or an object)? < Yes • No >
- (2) How long have you had the pain? < 1 year or longer • \_\_\_months or less • 1 month or less • 1 week or less >
- (3) How often do you feel the pain? < everyday • several times a week • several times a month • several times a year >

**7. Lower limbs (thigh, hip, knee, foot, etc.)** < have pain • no pain >

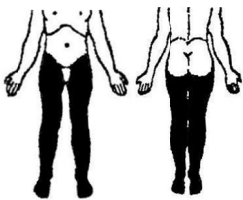

- (1) Is it because you were injured (e.g. fell, hit a person or an object)? < Yes • No >
- (2) How long have you had the pain? < 1 year or longer • \_\_\_months or less • 1 month or less • 1 week or less >
- (3) How often do you feel the pain? < everyday • several times a week • several times a month • several times a year >

\*If you have pain at two or more locations in your lower limbs, please answer only about one with the most severe (strongest) pain.

- (4) At which location do you have the pain? < (e.g., hip, knee, shin, ankle, instep, toe) \_\_\_\_\_ >
