# Supplementary material for: Dose–response relationship between sports activity and musculoskeletal pain in adolescents
Source: PubMed Central journal article supplement — Pain. 2016 Feb 27;157(6):1339–45. doi: 10.1097/j.pain.0000000000000529 (PMC4866582; doi:10.1097/j.pain.0000000000000529), 2016-02-27
Supplement: jop-157-1339-s003.pdf [file jop-157-1339-s003.pdf]

**Table S1.** Baseline prevalence and risk of new onset of pain by location

|             | Prevalence <sup>a</sup> , n=2403 |           |               | Risk <sup>b</sup> , n=374 |           |               |
|-------------|----------------------------------|-----------|---------------|---------------------------|-----------|---------------|
|             | Total                            | traumatic | Non-traumatic | Total                     | traumatic | Non-traumatic |
| Overall     | 634 (27.4)                       | 129 (5.8) | 509 (22.3)    | 82 (22.7)                 | 11 (3.1)  | 74 (20.6)     |
| Location    |                                  |           |               |                           |           |               |
| Neck        | 56 (2.4)                         | 5 (0.2)   | 50 (2.1)      | 9 (2.5)                   | 2 (0.5)   | 6 (1.6)       |
| Upper limbs | 224 (9.5)                        | 41 (1.8)  | 169 (7.2)     | 23 (6.3)                  | 3 (0.8)   | 18 (4.9)      |
| Chest       | 14 (0.6)                         | 1 (0.04)  | 13 (0.6)      | 3 (0.8)                   | 0 (0)     | 3 (0.8)       |
| Upper back  | 34 (1.4)                         | 2 (0.1)   | 30 (1.3)      | 1 (0.3)                   | 0 (0)     | 1 (0.3)       |
| Lower back  | 202 (8.5)                        | 16 (0.7)  | 177 (7.5)     | 26 (7.0)                  | 1 (0.3)   | 23 (6.2)      |
| Buttocks    | 19 (0.8)                         | 2 (0.1)   | 17 (0.7)      | 4 (1.1)                   | 0 (0)     | 4 (1.1)       |
| Lower limbs | 360 (15.4)                       | 77 (3.3)  | 257 (11.1)    | 44 (11.9)                 | 5 (1.4)   | 38 (10.3)     |

Values are numbers (percentages). Sample sizes (denominators) of number counts vary due to missing values.

<sup>a</sup> No duplication by student (1 record for each student).

<sup>b</sup> Point prevalence (new onset) of pain at 1-year follow-up, among those who had no pain and in 7th or 10th grade at baseline.
