# Supplementary material for: Dose–response relationship between sports activity and musculoskeletal pain in adolescents
Source: PubMed Central journal article supplement — Pain. 2016 Feb 27;157(6):1339–45. doi: 10.1097/j.pain.0000000000000529 (PMC4866582; doi:10.1097/j.pain.0000000000000529), 2016-02-27
Supplement: jop-157-1339-s004.pdf [file jop-157-1339-s004.pdf]

**Table S2.** Cross-sectional association between sports activity and pain prevalence by type of sport

|               | Number of students participating in <sup>a</sup> | P for linearity | PR (95% CI) per 1 hour/week of sports activity <sup>b</sup> |
|---------------|--------------------------------------------------|-----------------|-------------------------------------------------------------|
| Track & field | 59                                               | 0.02            | <b>1.03 (1.01-1.07)</b>                                     |
| Soft tennis   | 128                                              | 0.75            | 1.00 (0.98-1.02)                                            |
| Table tennis  | 52                                               | 0.84            | 1.00 (0.95-1.04)                                            |
| Badminton     | 74                                               | 0.07            | 1.02 (1.00-1.05)                                            |
| Kendo         | 61                                               | 0.004           | <b>1.04 (1.01-1.07)</b>                                     |
| Baseball      | 238                                              | <0.001          | <b>1.03 (1.02-1.04)</b>                                     |
| Softball      | 150                                              | <0.001          | <b>1.04 (1.02-1.05)</b>                                     |
| Basketball    | 146                                              | <0.001          | <b>1.05 (1.03-1.06)</b>                                     |
| Soccer        | 62                                               | 0.018           | <b>1.03 (1.01-1.06)</b>                                     |
| Volleyball    | 279                                              | <0.001          | <b>1.03 (1.02-1.04)</b>                                     |

CI, confidence interval; PR, prevalence ratio. Prevalence ratios were calculated with multiply imputed data. Each model included non-sports students (2078 records from 2008 and 2009 surveys) and students who participated in each type of sport. Other sports with small samples ( $n \leq 40$ ) were not analyzed.

<sup>a</sup>The sum of both years (2008 and 2009).

<sup>b</sup>Adjusted for sex, age, body mass index, sleep length, and screen time.
