# Supplementary material for: Dose–response relationship between sports activity and musculoskeletal pain in adolescents
Source: PubMed Central journal article supplement — Pain. 2016 Feb 27;157(6):1339–45. doi: 10.1097/j.pain.0000000000000529 (PMC4866582; doi:10.1097/j.pain.0000000000000529), 2016-02-27
Supplement: jop-157-1339-s005.pdf [file jop-157-1339-s005.pdf]

### A. Pain overall

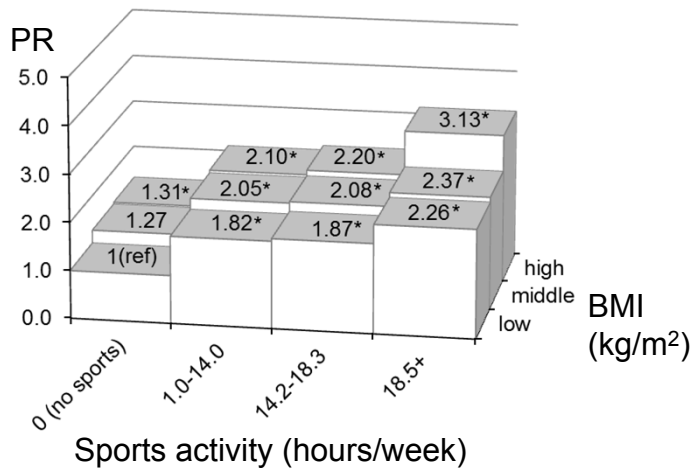

### B. Upper limb pain

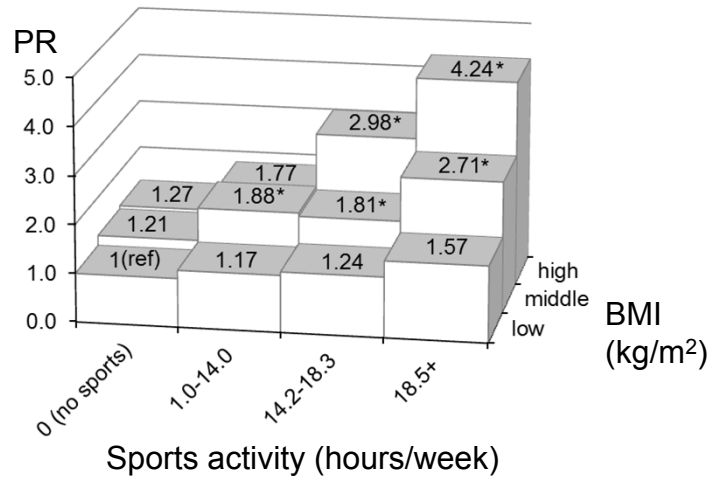

**Figure S2. Associations of sports activity and weight status with pain prevalence (n=2403).** Significant prevalence ratios (PRs) of (A) pain overall and (B) upper limb pain are indicated with asterisks (\*P<0.05). Tertiles of time spent in sports activity within students engaged in organized sports activity and tertiles of body mass index (BMI) within grades were used for cutpoints, and the group of students who did not participate in sports (0 hours/week) and had the lowest BMI served as the reference category.
